# Supplementary material for: Preserved antiviral adaptive immunity following polyclonal antibody immunotherapy for severe murine influenza infection
Source: PubMed Central journal article supplement (PMC4933909; doi:10.1038/srep29154), 2016-07-06
Supplement: srep29154-s1.pdf [file srep29154-s1.pdf]

## SUPPLEMENTARY INFORMATION

**Preserved antiviral adaptive immunity following polyclonal antibody immunotherapy for severe murine influenza infection**

**Natalie E. Stevens<sup>1</sup>, Antoinette Hatjopolous<sup>1</sup>, Cara K. Fraser<sup>2</sup>, Mohammed Alsharifi<sup>3</sup>, Kerrilyn R. Diener<sup>1,4</sup>, and John D. Hayball.<sup>1,4</sup>**

<sup>1</sup> *Experimental Therapeutics Laboratory, Hanson Institute, and Sansom Institute, School of Pharmacy and Medical Science, University of South Australia, Adelaide, SA, Australia;*

<sup>2</sup> *Preclinical, Imaging and Research Laboratories, South Australian Health and Medical Research Institute, Gilles Plains, Adelaide, SA, Australia;*

<sup>3</sup> *Vaccine Research Group, Department of Molecular and Cellular Biology, School of Biological Sciences, The University of Adelaide, Adelaide, SA, Australia;*

<sup>4</sup> *Robinson Research Institute, Discipline of Obstetrics and Gynaecology, School of Medicine, University of Adelaide, Adelaide, SA, Australia.*

**SUPPLEMENTARY FIGURE S1**

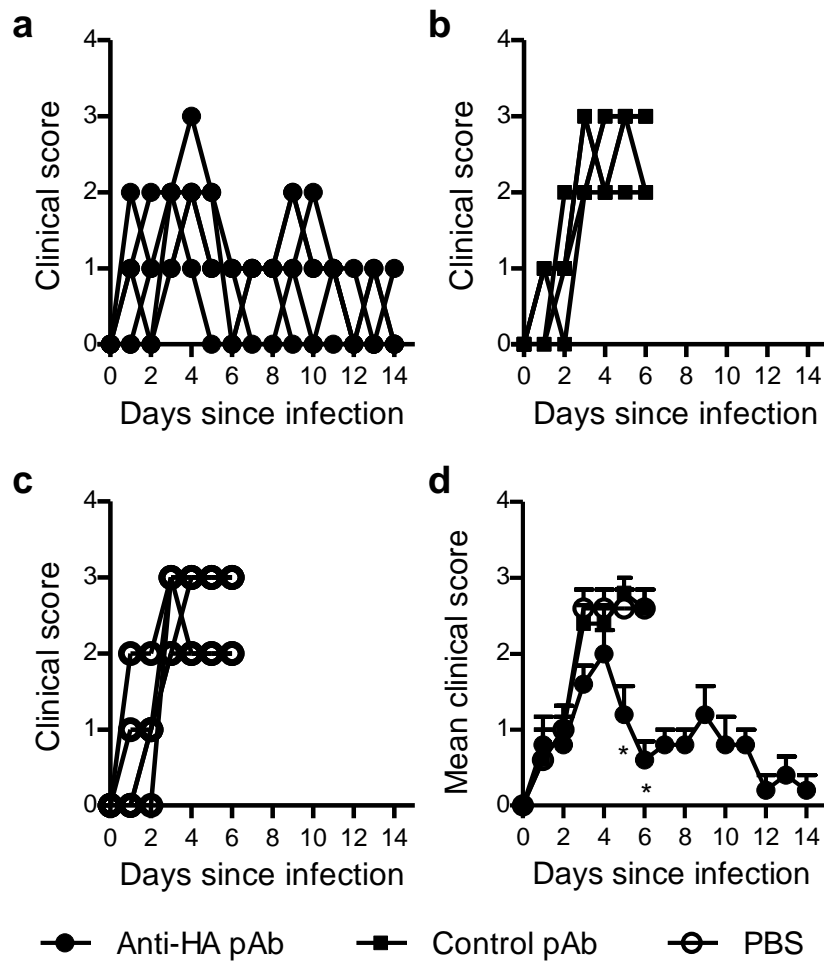

**Supplementary Figure S1: Prophylactic anti-HA pAb intraperitoneal administration reduces symptoms of influenza infection.** Mice ( $n = 5$ ) were administered (a) ovine anti-HA or (b) control pAbs (25 mg/kg), or (c) PBS, via intraperitoneal injection twenty four hours prior to infection with 500 TCID<sub>50</sub> PR8 influenza. Mice were monitored for disease progression and attributed a clinical score daily. Scores of individual mice (a-c) and mean + SEM group scores (d) are depicted. Mean scores of anti-HA pAb administration group on days 5 and 6 were compared to control groups via Mann-Whitney analysis, where \* =  $p > 0.05$ .

**SUPPLEMENTARY FIGURE S2**

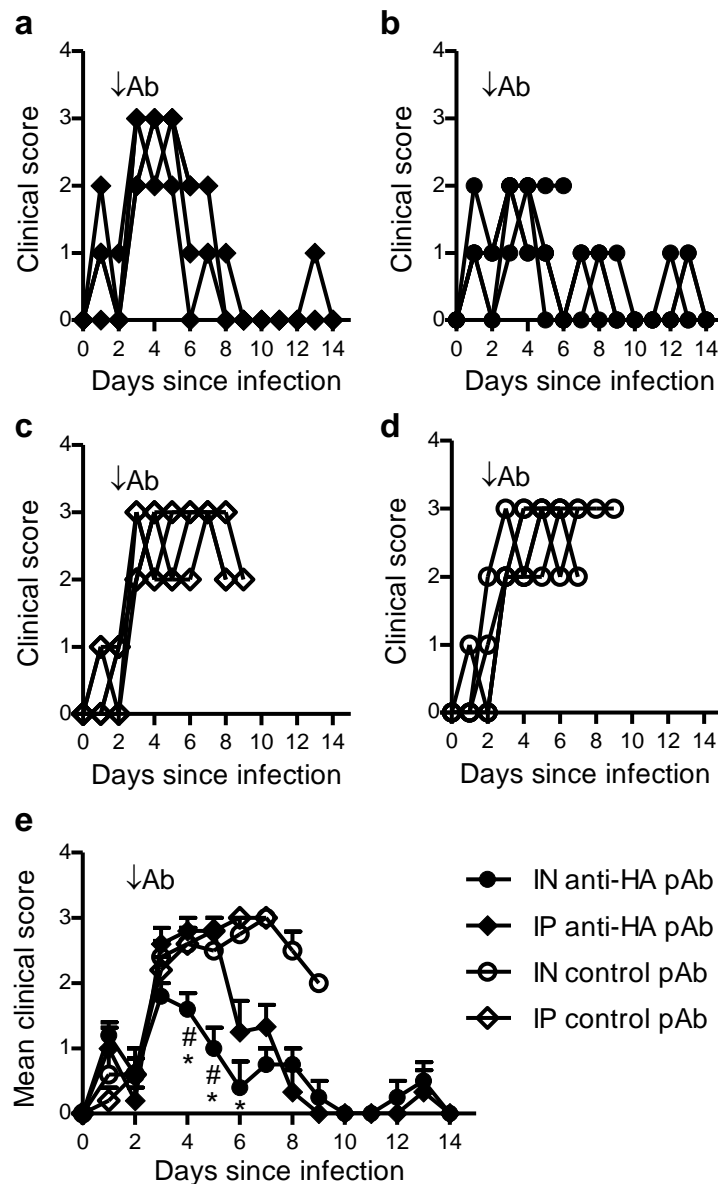

**Supplementary Figure S2: Intranasal administration of anti-HA pAbs significantly reduce the clinical symptoms of influenza infection.** Mice ( $n = 5$ ) were infected with 500 TCID<sub>50</sub> PR8 influenza and forty-eight hours later were administered ovine anti-HA pAbs (a, b) or control pAbs (c, d) (25 mg/kg) via intraperitoneal injection (a, c) or intranasal instillation (b, d). Individual mice were monitored for disease progression and attributed a clinical score daily (a-d), with group mean + SEM of scores indicated in (e). Average scores of the intranasal administration group on days 4, 5 and 6 were compared to control Ab administration and intraperitoneal anti-HA administration via Mann-Whitney analysis, where \* =  $p > 0.05$  compared to control groups, # =  $p > 0.05$  compared to IP anti-HA group.

**SUPPLEMENTARY FIGURE S3**

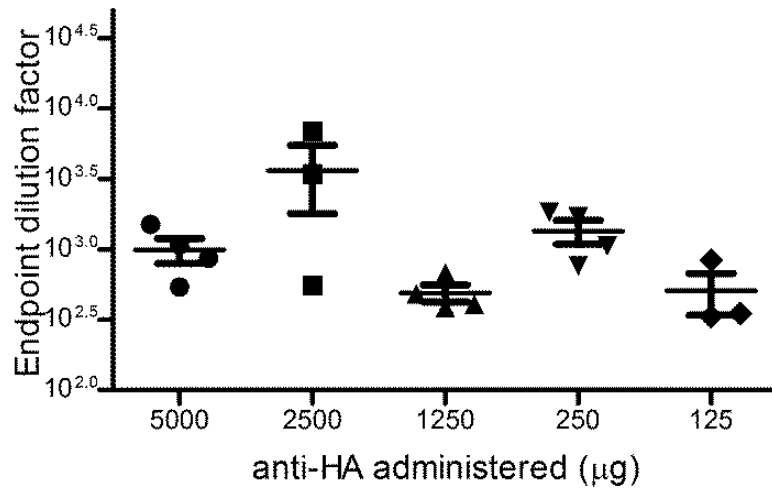

**Supplementary Figure S3: Passively administered anti-HA pAbs do not inhibit the generation of murine anti-PR8 Abs upon influenza infection.** Mice were intraperitoneally administered ovine serum containing anti-HA antibodies to the indicated dose, and twenty-four hours later were infected intranasally (32 µL) with 500 TCID<sub>50</sub> PR8 Influenza. Mice were bled 14 days following infection and anti-PR8 IgG titres were evaluated via endpoint ELISA. Data are presented as mean ± SEM.

#### SUPPLEMENTARY FIGURE S4

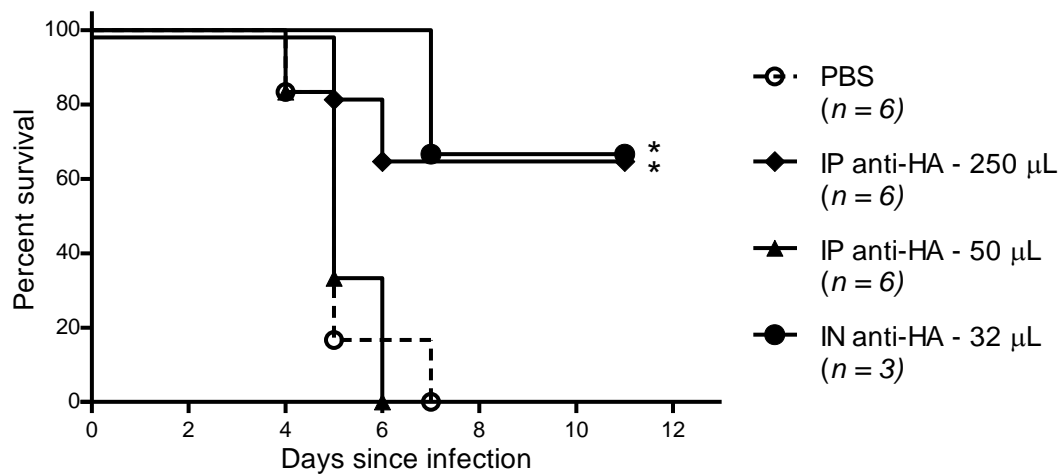

**Supplementary Figure S4: Effective influenza treatment can be achieved from a lower dose of anti-HA hyperimmune serum administered through an intranasal route compared to an intraperitoneal route in a murine influenza model** Mice ( $n = 3-6$ ) were infected with 500 TCID<sub>50</sub> PR8 influenza and twenty four hours later were intranasally (IN) or intraperitoneally (IP) administered anti-HA hyperimmune serum or PBS. Mice were monitored and those reaching a predetermined endpoint of 20% weight loss were euthanized. Survival curves of treatment groups are depicted. Mantel-Cox survival analysis was performed to compare treatment groups to PBS administration group; significance between survival curves is denoted as thus: \* =  $P < 0.05$ .
